# Supplementary material
Source: ML conference proceedings conference paper supplement (https://openaccess.thecvf.com/content/CVPR2023/html/Yao_Teacher-Generated_Spatial-Attention_Labels_CVPR_2023_paper.html)
Supplement: Supplementary file 1 [file Yao_Teacher-Generated_Spatial-Attention_Labels_CVPR_2023_supplemental.pdf]

## Appendix

In this appendix, we will add more details about some experiments reported in the paper, including

1. The accuracy of classification experiment on ImageNet-C of each corruption, average across all corruption levels, and with corruption level 1-5 respectively.
2. The precision recall curve for retrieval task on ImageNet and ImageNet-C of each corruption with corruption level 1-5.
3. The precision recall curve for retrieval task on CIFAR-10 and CIFAR-10-C of each corruption with corruption level 1-5.

### A. Classification accuracy on ImageNet-C

In Table [Supp.1](#), we compare the classification performance on ImageNet-C for baseline contrastive model and the proposed models trained with spatial-attention teacher guidance, average over the 5 different corruption/noise magnitudes in ImageNet-C. We further show the classification accuracy on ImageNet-C data set of each corruption type with corruption level 1-5 in Table [Supp.2](#) to [Supp.3](#) here, for our proposed model vs baseline. We can see that the proposed model outperforms baseline for most cases.

### B. Retrieval results on ImageNet and ImageNet-C

In Fig [Supp.1](#), we show the retrieval results on ImageNet and ImageNet-C (and CIFAR-10 and CIFAR-10-C) with one corruption: Fog.

In Fig [Supp.2](#) to Fig [Supp.6](#), we show the retrieval results on ImageNet ("clean"), and ImageNet-C ("noise level 1-5") of every type of corruption/noise, for the proposed method ("Contrastive attn teacher") compared to the baseline SimCLR ("Contrastive"). We can see that the proposed method obtains better results than the baseline for most corruption/noise types, except "contrast" corruption only.

### C. Retrieval results on CIFAR-10 and CIFAR-10-C

In Fig [Supp.7](#) to Fig [Supp.11](#), we show the retrieval results on CIFAR-10 ("clean"), and CIFAR-10-C ("noise level 1-5") of every type of corruption/noise, for the proposed method ("Contrastive attn teacher") compared to the baseline SimCLR ("Contrastive"). We can see that the proposed method outperformed the baseline for all corruption/noise types.

## D. Supplementary tables

Table Supp.1. ImageNet-C Top-1 classification accuracy for different models (mean  $\pm$  SE for 3 seeds).

|                           |                                    |                                    |                                    |                                    |                                    |
|---------------------------|------------------------------------|------------------------------------|------------------------------------|------------------------------------|------------------------------------|
| Model                     | Brightness                         | Contrast                           | Elastic                            | Pixelate                           | JPEG                               |
| Contrastive               | 60.10 $\pm$ 0.22                   | 52.07 $\pm$ 1.24                   | 33.00 $\pm$ 0.31                   | 46.49 $\pm$ 0.36                   | 45.78 $\pm$ 0.36                   |
| Contrastive attn. teacher | <b>60.94 <math>\pm</math> 0.15</b> | <b>52.18 <math>\pm</math> 0.16</b> | <b>34.42 <math>\pm</math> 0.33</b> | <b>48.27 <math>\pm</math> 1.46</b> | <b>46.41 <math>\pm</math> 0.60</b> |
| Model                     | Gaussian                           | Shot                               | Impluse                            | Defocus                            | Glass                              |
| Contrastive               | 28.15 $\pm$ 0.27                   | 24.18 $\pm$ 0.41                   | <b>16.64 <math>\pm</math> 1.23</b> | 23.61 $\pm$ 0.47                   | 13.45 $\pm$ 0.68                   |
| Contrastive attn. teacher | <b>28.30 <math>\pm</math> 0.54</b> | <b>24.84 <math>\pm</math> 0.26</b> | 16.49 $\pm$ 0.89                   | <b>24.45 <math>\pm</math> 0.59</b> | <b>13.87 <math>\pm</math> 0.08</b> |
| Model                     | Motion                             | Zoom                               | Snow                               | Frost                              | Fog                                |
| Contrastive               | 22.21 $\pm$ 0.45                   | 18.95 $\pm$ 0.60                   | 28.21 $\pm$ 0.08                   | 29.86 $\pm$ 0.18                   | 45.34 $\pm$ 0.53                   |
| Contrastive attn. teacher | <b>22.81 <math>\pm</math> 1.06</b> | <b>19.10 <math>\pm</math> 0.23</b> | <b>29.78 <math>\pm</math> 0.21</b> | <b>31.13 <math>\pm</math> 0.63</b> | <b>46.12 <math>\pm</math> 0.52</b> |
| Model                     | Speckle Noise                      | Gaussian Blur                      | Spatter                            | Saturate                           | Average                            |
| Contrastive               | 28.23 $\pm$ 0.31                   | 26.16 $\pm$ 0.07                   | 43.08 $\pm$ 0.18                   | 60.42 $\pm$ 0.15                   | 34.00 $\pm$ 0.06                   |
| Contrastive attn. teacher | <b>29.15 <math>\pm</math> 0.65</b> | <b>27.10 <math>\pm</math> 0.35</b> | <b>44.04 <math>\pm</math> 0.08</b> | <b>60.50 <math>\pm</math> 0.02</b> | <b>34.73 <math>\pm</math> 0.06</b> |

Table Supp.2. Classification accuracy on ImageNet-C for each corruption type with corruption level 1-5.

|                           |                                    |                                    |                                    |                                    |                                    |
|---------------------------|------------------------------------|------------------------------------|------------------------------------|------------------------------------|------------------------------------|
| Model                     | Brightness 1                       | Brightness 2                       | Brightness 3                       | Brightness 4                       | Brightness 5                       |
| Contrastive               | 65.32 $\pm$ 0.04                   | 63.92 $\pm$ 0.12                   | 61.57 $\pm$ 0.16                   | 57.67 $\pm$ 0.26                   | 52.05 $\pm$ 0.55                   |
| Contrastive attn. teacher | <b>66.07 <math>\pm</math> 0.13</b> | <b>64.78 <math>\pm</math> 0.22</b> | <b>62.42 <math>\pm</math> 0.09</b> | <b>58.51 <math>\pm</math> 0.19</b> | <b>52.96 <math>\pm</math> 0.26</b> |
| Model                     | Contrast 1                         | Contrast 2                         | Contrast 3                         | Contrast 4                         | Contrast 5                         |
| Contrastive               | 64.21 $\pm$ 0.14                   | 63.46 $\pm$ 0.26                   | 61.54 $\pm$ 0.56                   | <b>50.55 <math>\pm</math> 1.74</b> | 20.60 $\pm$ 3.61                   |
| Contrastive attn. teacher | <b>64.78 <math>\pm</math> 0.05</b> | <b>63.97 <math>\pm</math> 0.03</b> | <b>61.79 <math>\pm</math> 0.07</b> | 49.66 $\pm$ 0.53                   | <b>20.62 <math>\pm</math> 0.92</b> |
| Model                     | Elastic 1                          | Elastic 2                          | Elastic 3                          | Elastic 4                          | Elastic 5                          |
| Contrastive               | 57.53 $\pm$ 0.13                   | 36.38 $\pm$ 0.10                   | 40.44 $\pm$ 0.56                   | 24.60 $\pm$ 0.76                   | 6.03 $\pm$ 0.30                    |
| Contrastive attn. teacher | <b>58.40 <math>\pm</math> 0.35</b> | <b>37.76 <math>\pm</math> 0.32</b> | <b>42.40 <math>\pm</math> 0.38</b> | <b>26.78 <math>\pm</math> 0.42</b> | <b>6.75 <math>\pm</math> 0.40</b>  |
| Model                     | JPEG 1                             | JPEG 2                             | JPEG 3                             | JPEG 4                             | JPEG 5                             |
| Contrastive               | 54.74 $\pm$ 0.64                   | 51.52 $\pm$ 0.81                   | 49.02 $\pm$ 0.86                   | 41.55 $\pm$ 0.72                   | 32.07 $\pm$ 0.62                   |
| Contrastive attn. teacher | <b>55.79 <math>\pm</math> 0.33</b> | <b>52.33 <math>\pm</math> 0.47</b> | <b>49.78 <math>\pm</math> 0.58</b> | <b>42.01 <math>\pm</math> 0.66</b> | <b>32.14 <math>\pm</math> 1.06</b> |
| Model                     | Gaussian 1                         | Gaussian 2                         | Gaussian 3                         | Gaussian 4                         | Gaussian 5                         |
| Contrastive               | <b>53.51 <math>\pm</math> 0.39</b> | <b>43.37 <math>\pm</math> 0.52</b> | <b>27.95 <math>\pm</math> 0.35</b> | 12.64 $\pm$ 0.81                   | 3.30 $\pm$ 0.58                    |
| Contrastive attn. teacher | 53.37 $\pm$ 0.30                   | 43.24 $\pm$ 0.54                   | 27.93 $\pm$ 0.71                   | <b>13.15 <math>\pm</math> 0.81</b> | <b>3.63 <math>\pm</math> 0.51</b>  |
| Model                     | Shot 1                             | Shot 2                             | Shot 3                             | Shot 4                             | Shot 5                             |
| Contrastive               | 49.72 $\pm$ 0.42                   | 36.65 $\pm$ 0.12                   | 22.84 $\pm$ 0.54                   | 8.17 $\pm$ 0.86                    | 3.51 $\pm$ 0.61                    |
| Contrastive attn. teacher | <b>50.51 <math>\pm</math> 0.53</b> | <b>37.49 <math>\pm</math> 0.53</b> | <b>23.58 <math>\pm</math> 0.21</b> | <b>8.82 <math>\pm</math> 0.69</b>  | <b>3.79 <math>\pm</math> 0.71</b>  |
| Model                     | Impulse 1                          | Impulse 2                          | Impulse 3                          | Impulse 4                          | Impulse 5                          |
| Contrastive               | <b>36.02 <math>\pm</math> 2.22</b> | <b>23.52 <math>\pm</math> 1.88</b> | <b>15.49 <math>\pm</math> 1.38</b> | 5.89 $\pm$ 0.54                    | 2.26 $\pm$ 0.28                    |
| Contrastive attn. teacher | 35.00 $\pm$ 1.99                   | 22.83 $\pm$ 1.77                   | 15.39 $\pm$ 0.84                   | <b>6.61 <math>\pm</math> 0.26</b>  | <b>2.63 <math>\pm</math> 0.34</b>  |
| Model                     | Pixelate 1                         | Pixelate 2                         | Pixelate 3                         | Pixelate 4                         | Pixelate 5                         |
| Contrastive               | 57.80 $\pm$ 0.19                   | 54.04 $\pm$ 0.38                   | 48.53 $\pm$ 0.56                   | 39.13 $\pm$ 0.43                   | 32.94 $\pm$ 0.30                   |
| Contrastive attn. teacher | <b>58.49 <math>\pm</math> 1.14</b> | <b>55.05 <math>\pm</math> 1.25</b> | <b>50.37 <math>\pm</math> 1.63</b> | <b>41.64 <math>\pm</math> 1.82</b> | <b>35.81 <math>\pm</math> 1.54</b> |
| Model                     | Defocus 1                          | Defocus 2                          | Defocus 3                          | Defocus 4                          | Defocus 5                          |
| Contrastive               | 43.46 $\pm$ 0.59                   | 34.78 $\pm$ 0.91                   | 20.78 $\pm$ 0.70                   | 11.95 $\pm$ 0.35                   | 7.06 $\pm$ 0.49                    |
| Contrastive attn. teacher | <b>44.07 <math>\pm</math> 0.17</b> | <b>35.43 <math>\pm</math> 0.42</b> | <b>21.84 <math>\pm</math> 0.82</b> | <b>13.14 <math>\pm</math> 0.95</b> | <b>7.80 <math>\pm</math> 0.78</b>  |
| Model                     | Glass 1                            | Glass 2                            | Glass 3                            | Glass 4                            | Glass 5                            |
| Contrastive               | 36.65 $\pm$ 1.10                   | 20.88 $\pm$ 1.22                   | 4.97 $\pm$ 0.55                    | <b>2.92 <math>\pm</math> 0.34</b>  | 1.85 $\pm$ 0.17                    |
| Contrastive attn. teacher | <b>37.71 <math>\pm</math> 0.60</b> | <b>21.79 <math>\pm</math> 0.17</b> | <b>5.17 <math>\pm</math> 0.40</b>  | 2.80 $\pm$ 0.17                    | <b>1.89 <math>\pm</math> 0.10</b>  |

Table Supp.3. Classification accuracy on ImageNet-C for each corruption type with corruption level 1-5.

|                           |                     |                     |                     |                     |                     |
|---------------------------|---------------------|---------------------|---------------------|---------------------|---------------------|
| Model                     | Motion 1            | Motion 2            | Motion 3            | Motion 4            | Motion 5            |
| Contrastive               | 52.49 ± 0.53        | 35.65 ± 0.73        | 14.49 ± 0.76        | 5.30 ± 0.53         | 3.15 ± 0.36         |
| Contrastive attn. teacher | <b>53.33 ± 0.24</b> | <b>36.79 ± 1.87</b> | <b>15.16 ± 2.31</b> | <b>5.53 ± 0.65</b>  | <b>3.23 ± 0.28</b>  |
| Model                     | Zoom 1              | Zoom 2              | Zoom 3              | Zoom 4              | Zoom 5              |
| Contrastive               | 31.43 ± 0.57        | 22.00 ± 0.57        | 18.18 ± 0.75        | 13.23 ± 0.67        | 9.89 ± 0.57         |
| Contrastive attn. teacher | <b>31.83 ± 0.31</b> | <b>22.23 ± 0.15</b> | <b>18.22 ± 0.39</b> | <b>13.25 ± 0.47</b> | <b>9.99 ± 0.37</b>  |
| Model                     | Snow 1              | Snow 2              | Snow 3              | Snow 4              | Snow 5              |
| Contrastive               | 45.62 ± 0.24        | 25.89 ± 0.14        | 30.01 ± 0.29        | 21.94 ± 0.25        | 17.58 ± 0.24        |
| Contrastive attn. teacher | <b>47.07 ± 0.29</b> | <b>27.78 ± 0.25</b> | <b>31.54 ± 0.36</b> | <b>23.46 ± 0.44</b> | <b>19.08 ± 0.22</b> |
| Model                     | Frost 1             | Frost 2             | Frost 3             | Frost 4             | Frost 5             |
| Contrastive               | 51.32 ± 0.28        | 34.38 ± 0.13        | 24.29 ± 0.23        | 22.14 ± 0.14        | 17.20 ± 0.15        |
| Contrastive attn. teacher | <b>52.43 ± 0.32</b> | <b>35.76 ± 0.69</b> | <b>25.65 ± 0.81</b> | <b>23.53 ± 0.71</b> | <b>18.29 ± 0.65</b> |
| Model                     | Fog 1               | Fog 2               | Fog 3               | Fog 4               | Fog 5               |
| Contrastive               | 56.81 ± 0.37        | 52.51 ± 0.45        | 45.87 ± 0.61        | 41.79 ± 0.62        | 29.71 ± 0.62        |
| Contrastive attn. teacher | <b>57.39 ± 0.29</b> | <b>53.03 ± 0.54</b> | <b>46.68 ± 0.48</b> | <b>42.72 ± 0.61</b> | <b>30.79 ± 0.69</b> |
| Model                     | Speckle Noise 1     | Speckle Noise 2     | Speckle Noise 3     | Speckle Noise 4     | Speckle Noise 5     |
| Contrastive               | 50.53 ± 0.52        | 42.83 ± 0.43        | 23.33 ± 0.24        | 15.47 ± 0.21        | 8.99 ± 0.40         |
| Contrastive attn. teacher | <b>51.48 ± 0.19</b> | <b>43.89 ± 0.64</b> | <b>24.49 ± 1.18</b> | <b>16.25 ± 0.89</b> | <b>9.61 ± 0.93</b>  |
| Model                     | Gaussian Blur 1     | Gaussian Blur 2     | Gaussian Blur 3     | Gaussian Blur 4     | Gaussian Blur 5     |
| Contrastive               | 54.82 ± 0.44        | 37.38 ± 0.60        | 22.42 ± 0.09        | 12.36 ± 0.51        | 3.81 ± 0.40         |
| Contrastive attn. teacher | <b>55.97 ± 0.77</b> | <b>37.92 ± 0.22</b> | <b>23.37 ± 0.86</b> | <b>13.74 ± 1.03</b> | <b>4.49 ± 0.52</b>  |
| Model                     | Spatter 1           | Spatter 2           | Spatter 3           | Spatter 4           | Spatter 5           |
| Contrastive               | 63.95 ± 0.30        | 53.99 ± 0.15        | 41.75 ± 0.12        | 33.13 ± 0.37        | 22.59 ± 0.23        |
| Contrastive attn. teacher | <b>64.70 ± 0.17</b> | <b>54.77 ± 0.15</b> | <b>42.66 ± 0.41</b> | <b>34.37 ± 0.39</b> | <b>23.68 ± 0.36</b> |
| Model                     | Saturate 1          | Saturate 2          | Saturate 3          | Saturate 4          | Saturate 5          |
| Contrastive               | 64.10 ± 0.24        | <b>61.33 ± 0.09</b> | 64.85 ± 0.17        | 59.98 ± 0.20        | <b>51.83 ± 0.21</b> |
| Contrastive attn. teacher | <b>64.35 ± 0.27</b> | 60.63 ± 0.27        | <b>65.45 ± 0.16</b> | <b>60.42 ± 0.20</b> | 51.64 ± 0.32        |

## E. Supplementary figures

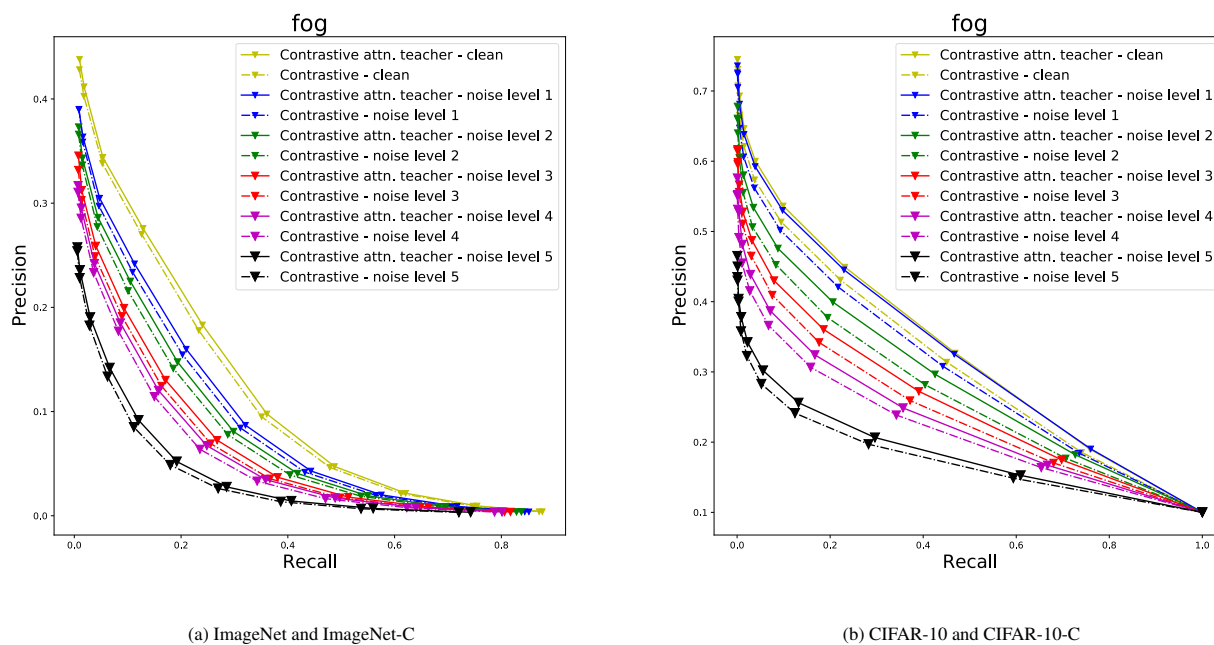

(a) ImageNet and ImageNet-C

(b) CIFAR-10 and CIFAR-10-C

Figure Supp.1. (a) Precision recall curve for retrieval on ImageNet validation set ("clean") and ImageNet-C with fog corruption ("noise level 1-5"). (b) CIFAR-10 test set and CIFAR-10-C. Figures for other corruption types on both data sets can be found in the supplementary material.

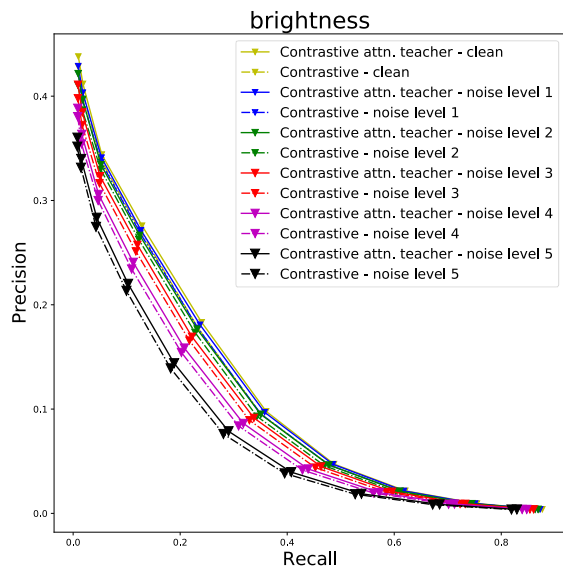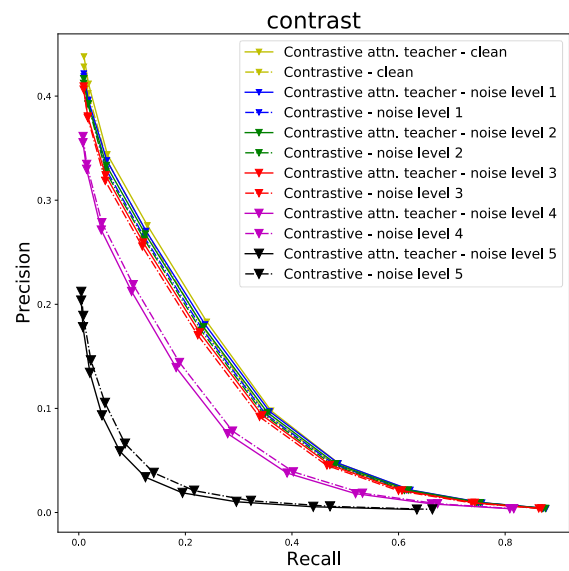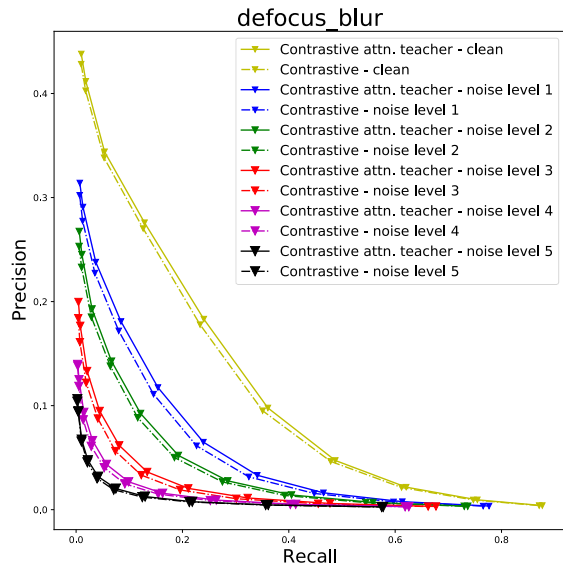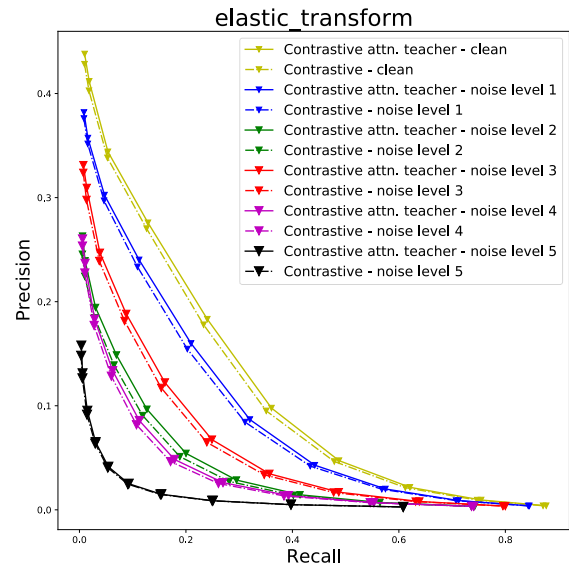

Figure Supp.2. Precision recall curve for retrieval on ImageNet validation set ("clean") and ImageNet-C with 4 corruptions, each with 5 corruption/noise level ("noise level 1-5").

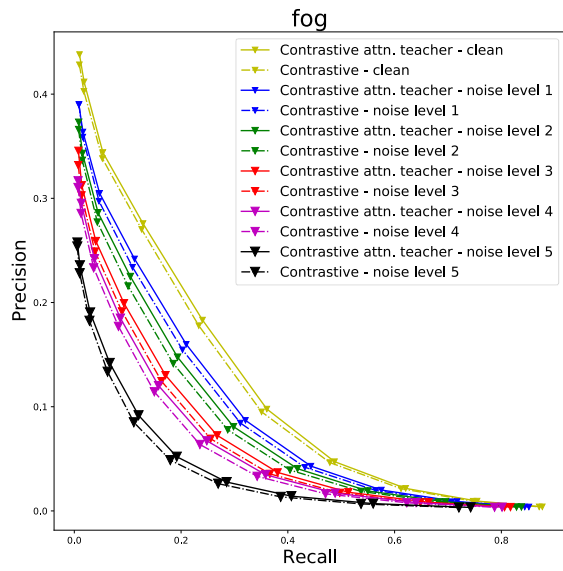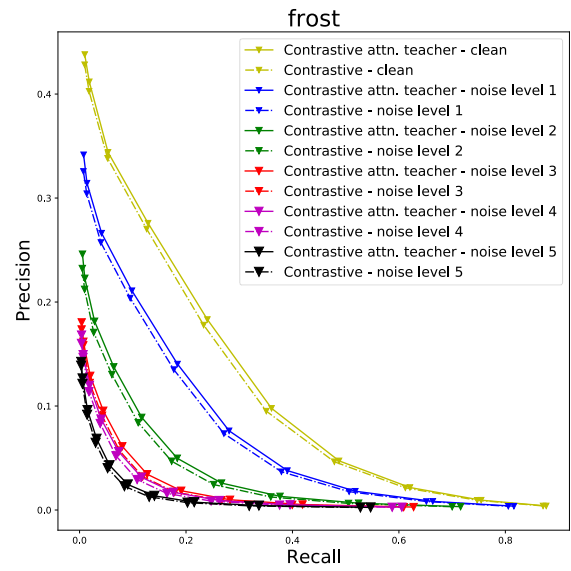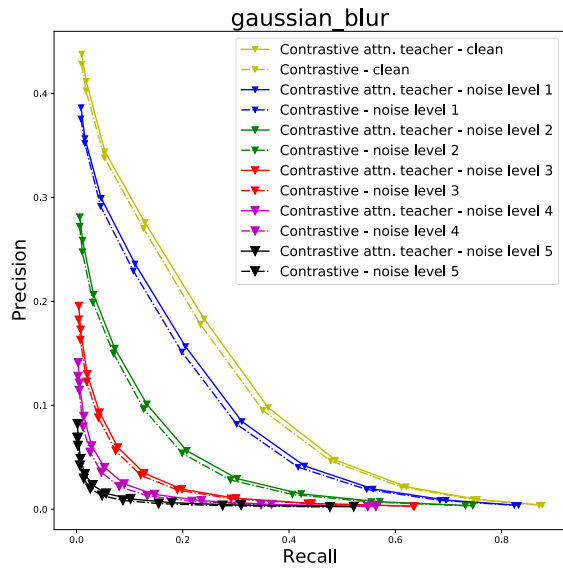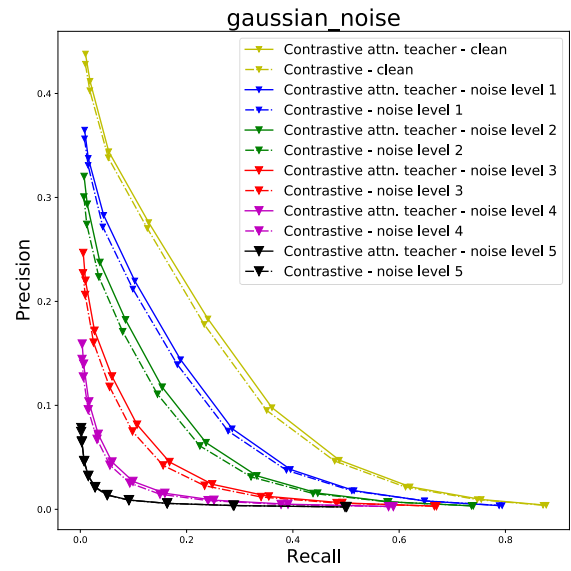

Figure Supp.3. Precision recall curve for retrieval on ImageNet validation set ("clean") and ImageNet-C with 4 corruptions, each with 5 corruption/noise level ("noise level 1-5").

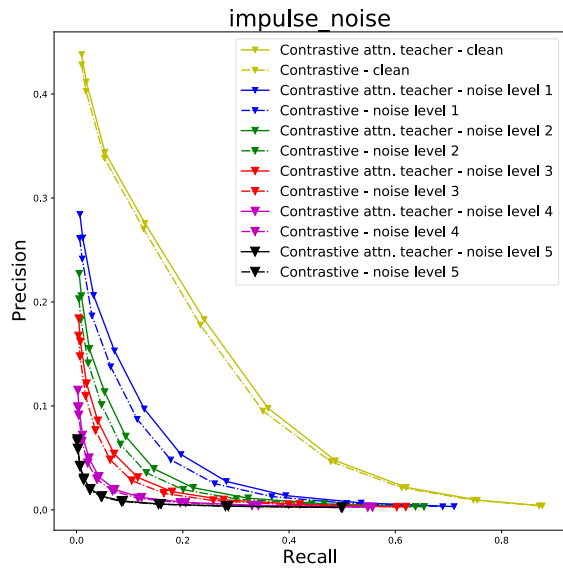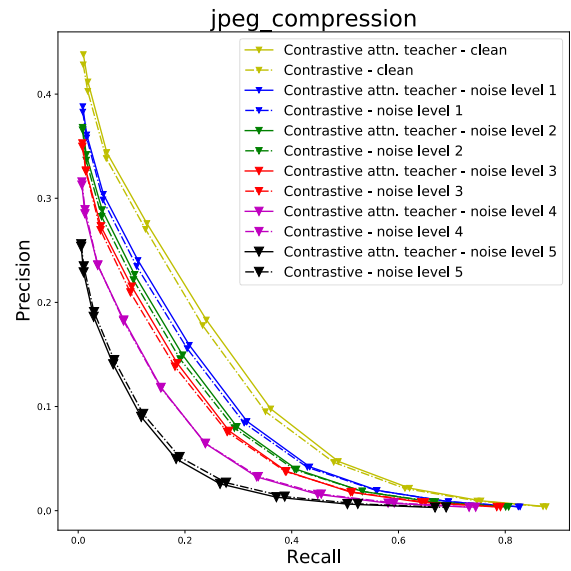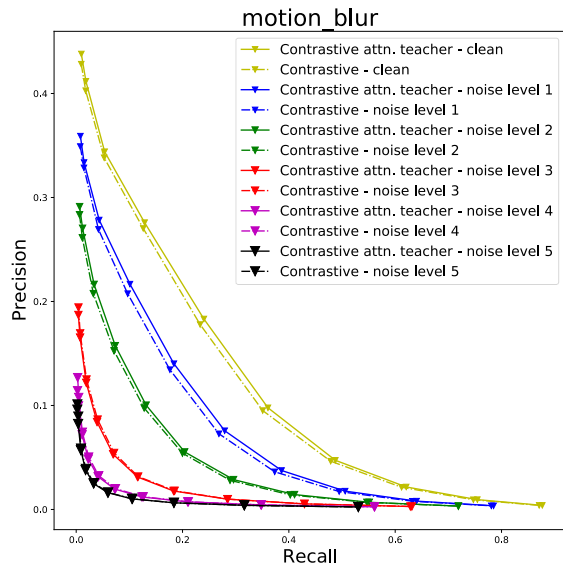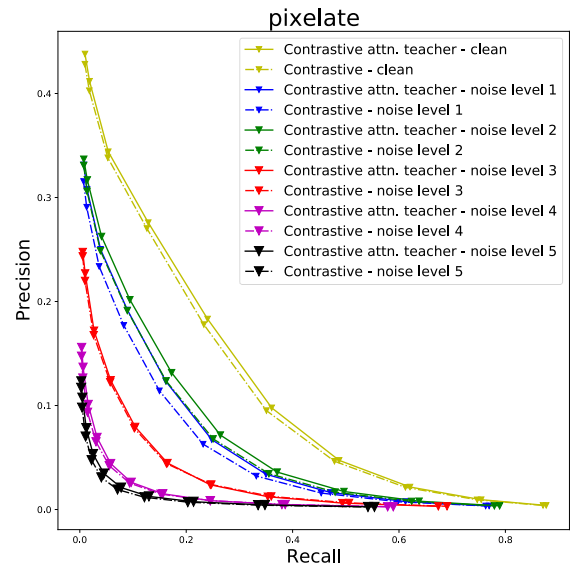

Figure Supp.4. Precision recall curve for retrieval on ImageNet validation set ("clean") and ImageNet-C with 4 corruptions, each with 5 corruption/noise level ("noise level 1-5").



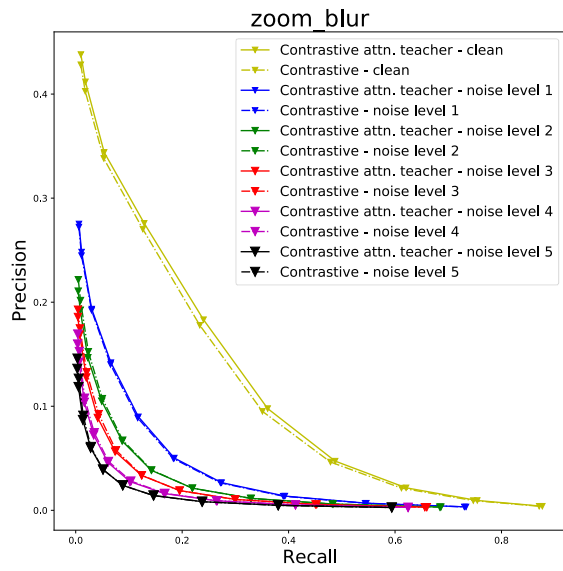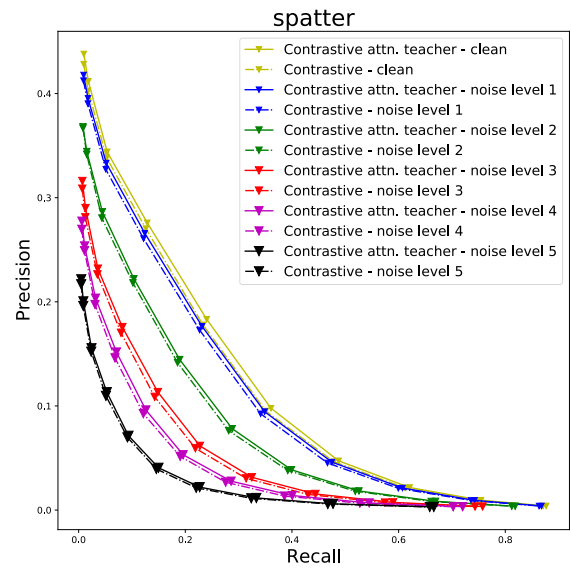

Figure Supp.5. Precision recall curve for retrieval on ImageNet validation set ("clean") and ImageNet-C with 4 corruptions, each with 5 corruption/noise level ("noise level 1-5").

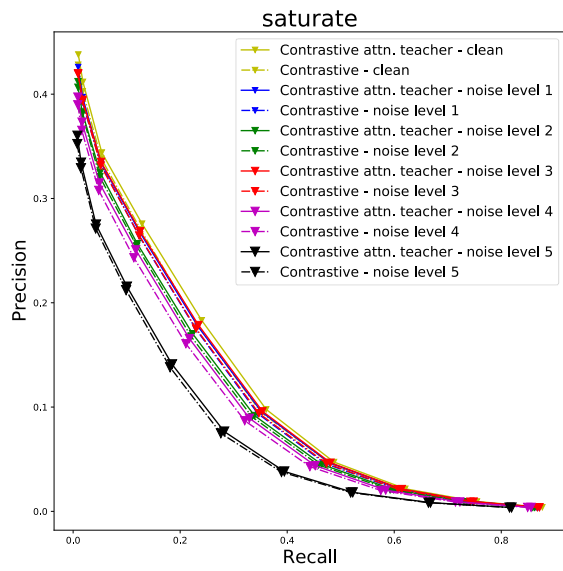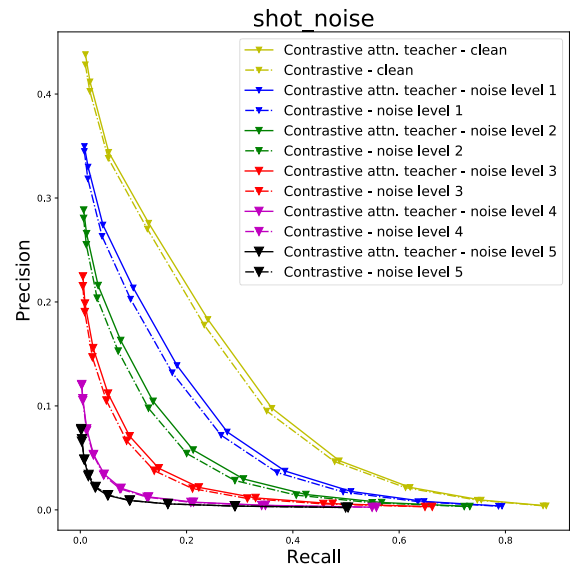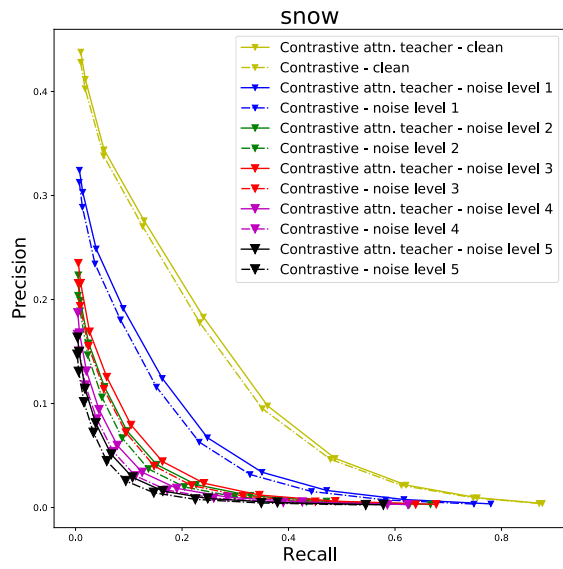

Figure Supp.6. Precision recall curve for retrieval on ImageNet validation set ("clean") and ImageNet-C with 4 corruptions, each with 5 corruption/noise level ("noise level 1-5").

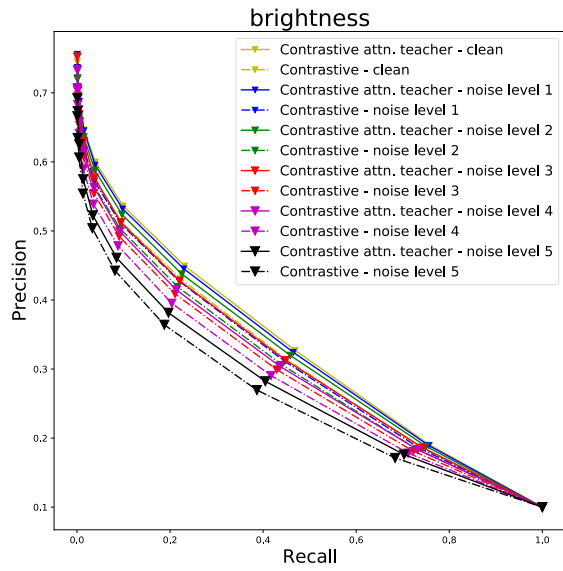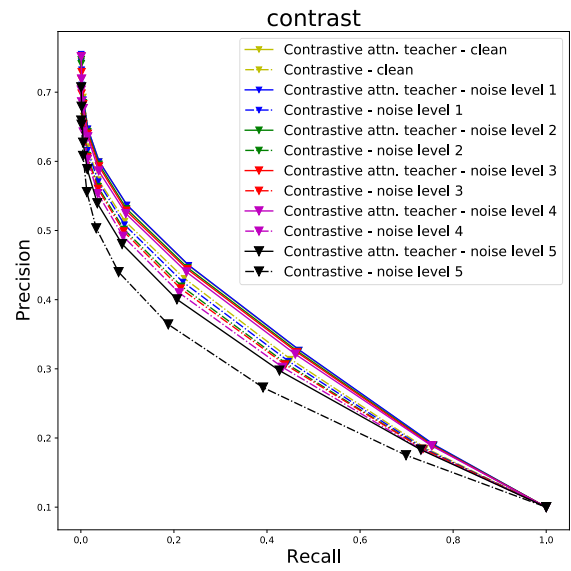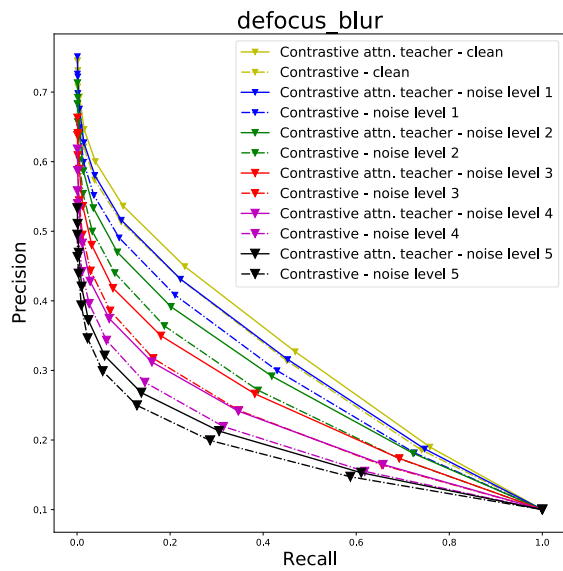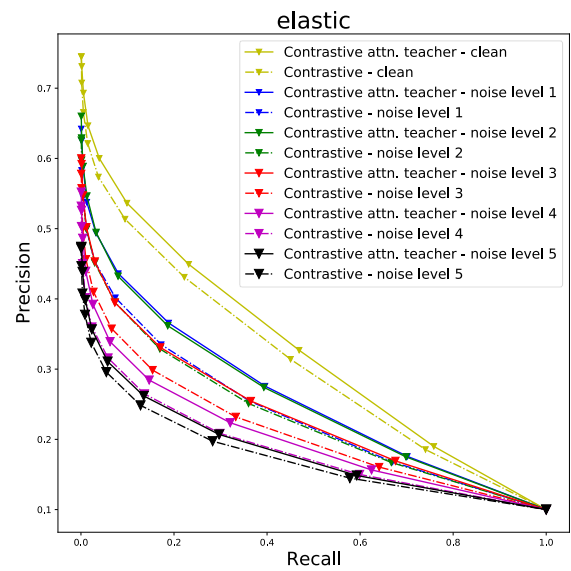

Figure Supp.7. Precision recall curve for retrieval on CIFAR-10 test set ("clean") and CIFAR10-C ("noise level 1-5").

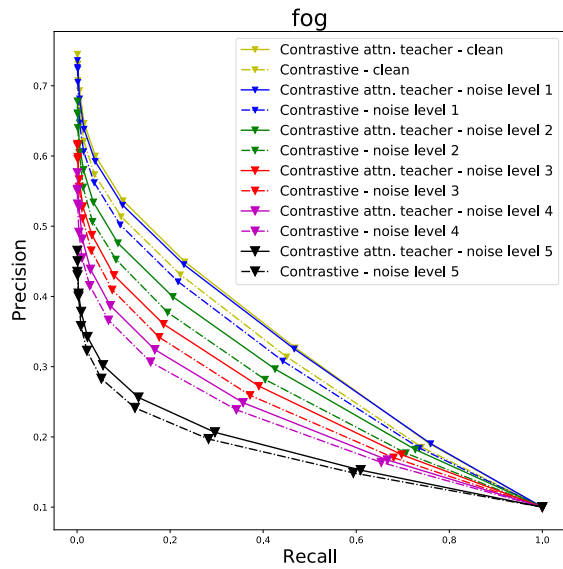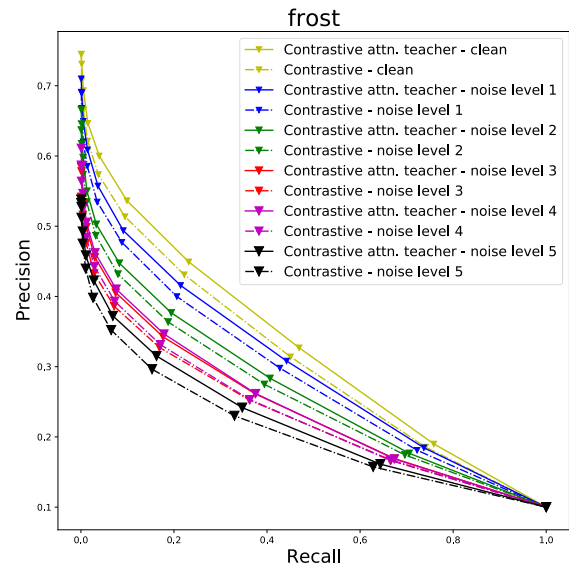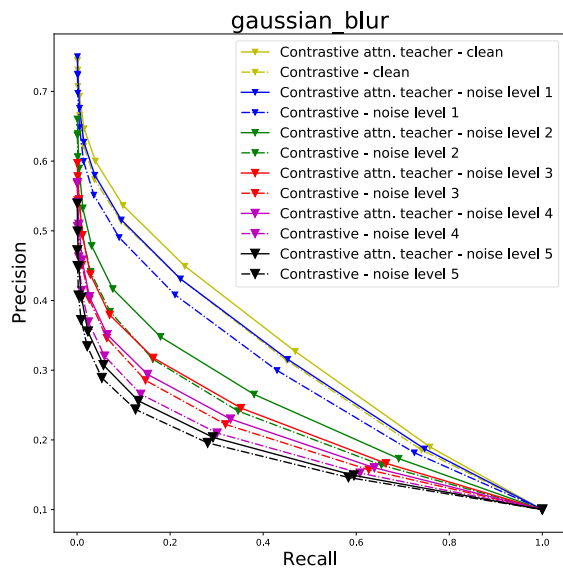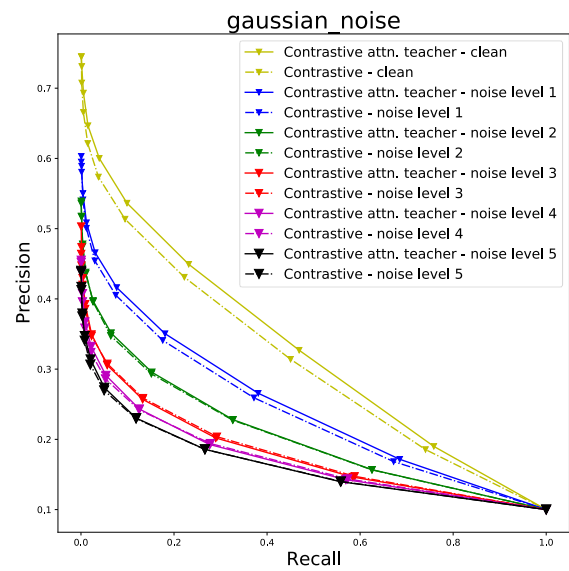

Figure Supp.8. Precision recall curve for retrieval on CIFAR-10 test set ("clean") and CIFAR10-C ("noise level 1-5").

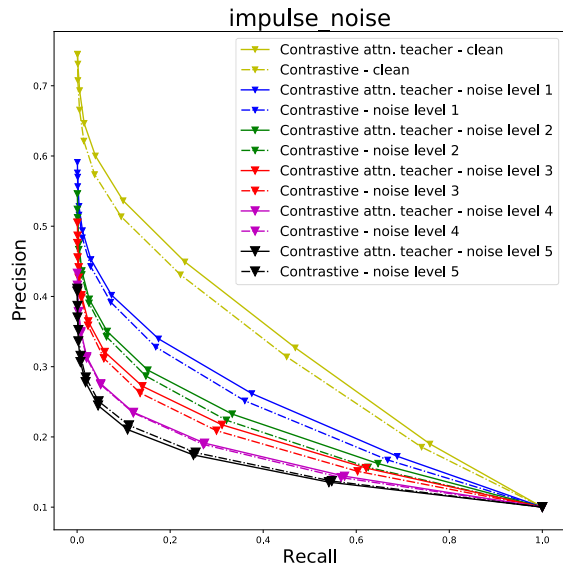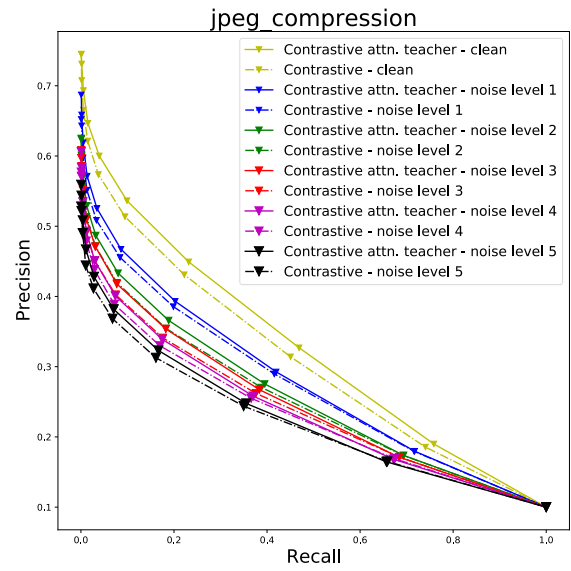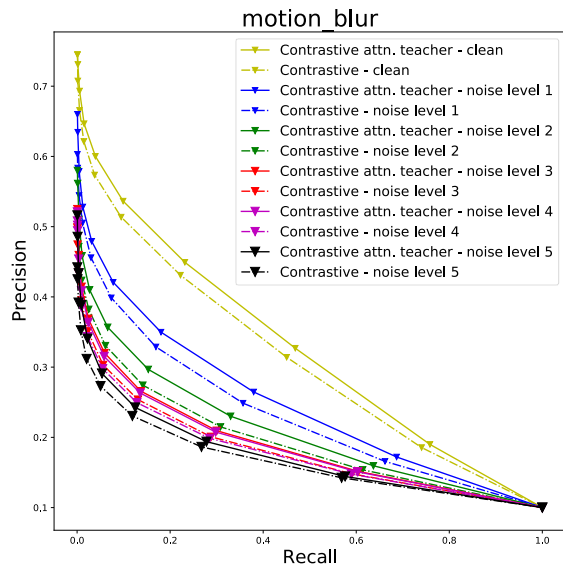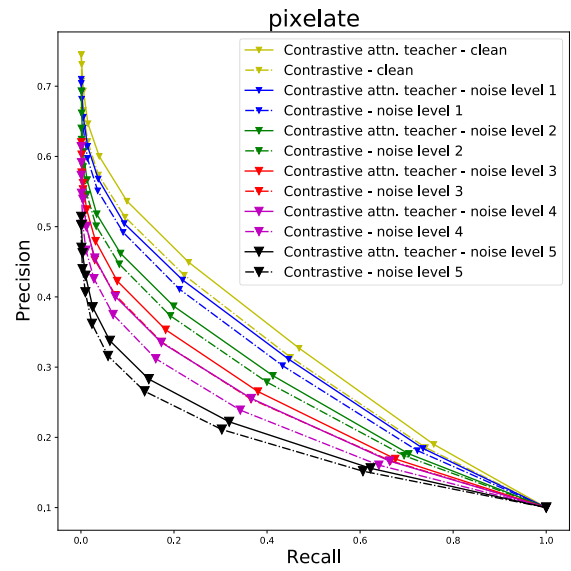

Figure Supp.9. Precision recall curve for retrieval on CIFAR-10 test set ("clean") and CIFAR10-C ("noise level 1-5").

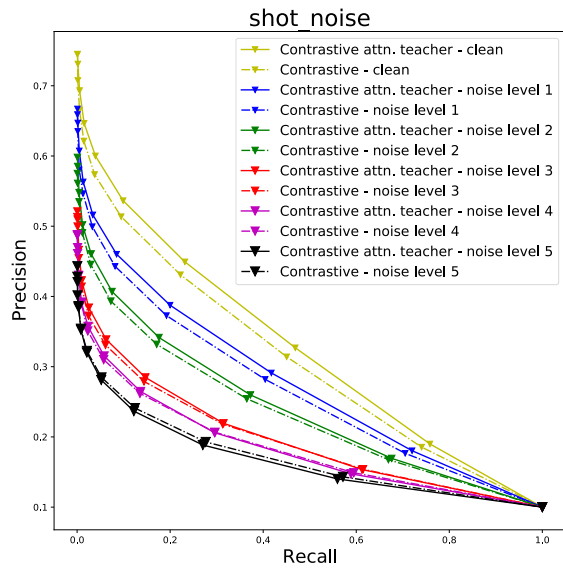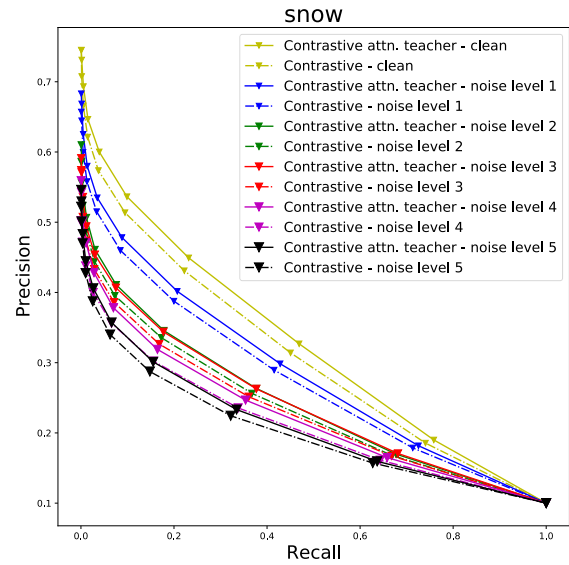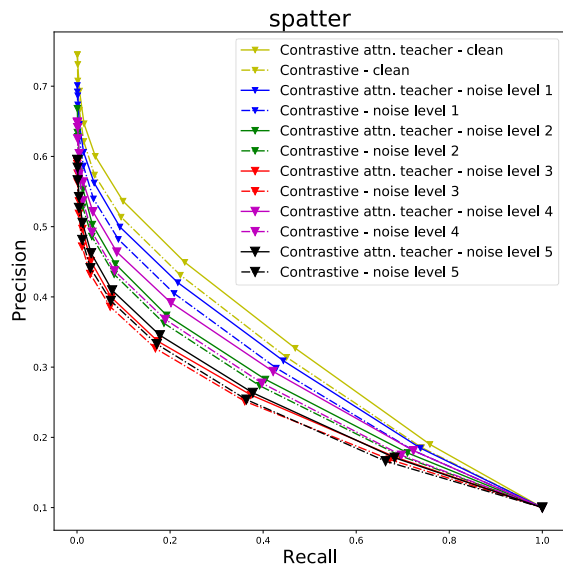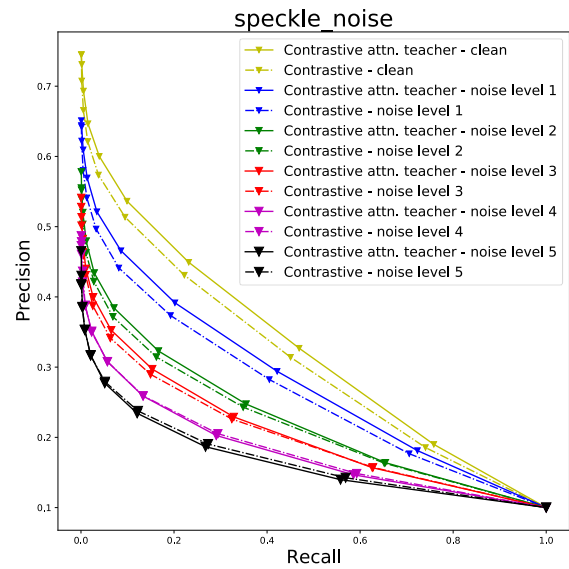

Figure Supp.10. Precision recall curve for retrieval on CIFAR-10 test set ("clean") and CIFAR10-C ("noise level 1-5").

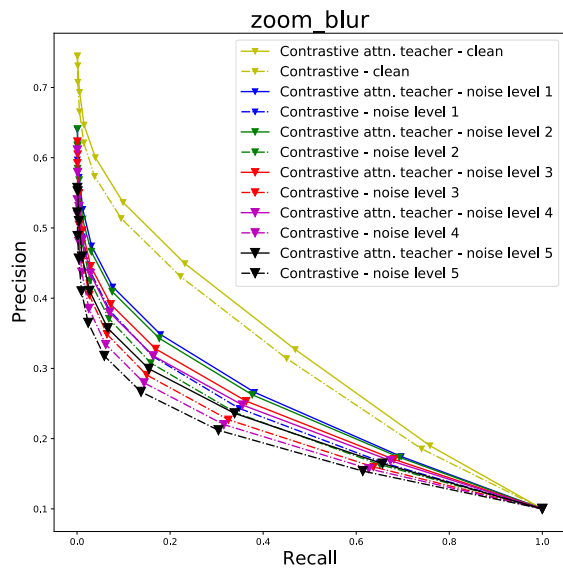

Figure Supp.11. Precision recall curve for retrieval on CIFAR-10 test set ("clean") and CIFAR10-C ("noise level 1-5").
